# Supplementary material
Source: PubMed Central journal article supplement (PMC3602888)
Supplement: 97320630009187S1.pdf [file 97320630009187S1.pdf]

## Supplementary material:

**Table 1:** List of KO (KEGG Orthology) Numbers & genes of the Essential Non-human homolog metabolic proteins of *S. aureus* N315

| Metabolic pathway                               | KO number (gene name)                                                                                                                                                                                                                                                                      |
|-------------------------------------------------|--------------------------------------------------------------------------------------------------------------------------------------------------------------------------------------------------------------------------------------------------------------------------------------------|
| <b>Energy Metabolism</b>                        |                                                                                                                                                                                                                                                                                            |
| (a) Carbonfixation pathways in prokaryotes      | KO0925(ackA), KO0625(eutD)                                                                                                                                                                                                                                                                 |
| (b) Methane metabolism                          | KO0925(ackA), KO1624(fbaA), KO0625(eutD)                                                                                                                                                                                                                                                   |
| (c) Oxidative phosphorylation                   | KO2109(TpF)                                                                                                                                                                                                                                                                                |
| <b>Carbohydrate metabolism</b>                  |                                                                                                                                                                                                                                                                                            |
| (a) Pyruvate metabolism                         | KO0625(eutD), KO0925(ackA), K01962(accA)                                                                                                                                                                                                                                                   |
| (b) Propanoate metabolism                       | KO0925(ackA), KO065(eutD), K01962(accA)                                                                                                                                                                                                                                                    |
| (c) Pentose phosphate pathway                   | KO1839(drm), KO1624(fbaA)                                                                                                                                                                                                                                                                  |
| (d) Fructose and Mannose metabolism             | KO2768(fruA), KO2769(fruA), KO2770(fruA), KO1624(fbaA), KO2798(mtIA), KO2793, KO2794, KO2795, KO1809(pmi), KO0009(mtID)                                                                                                                                                                    |
| (e) Amino sugar and Nucleotide sugar metabolism | KO1809(pmi), KO0790(murA)                                                                                                                                                                                                                                                                  |
| (f) Glycolysis (Gluconeogenesis)                | KO1624(fbaA)                                                                                                                                                                                                                                                                               |
| <b>Lipid metabolism</b>                         |                                                                                                                                                                                                                                                                                            |
| Glycerolipid metabolism                         | KO3621(plsX), KO3691(plsY)                                                                                                                                                                                                                                                                 |
| <b>Nucleotide metabolism</b>                    |                                                                                                                                                                                                                                                                                            |
| (a) Purine metabolism                           | KO1428(ureC), KO1839(drm), KO3040(rpoA), K02335(poIA)                                                                                                                                                                                                                                      |
| Pyrimidine metabolism                           | KO3040(rpoA), K02335(poIA)                                                                                                                                                                                                                                                                 |
| <b>Amino acid metabolism</b>                    |                                                                                                                                                                                                                                                                                            |
| (a) Tryptophan metabolism                       | KO1696(trpB)                                                                                                                                                                                                                                                                               |
| (b) Arginine and Proline metabolism             | KO1428(ureC)                                                                                                                                                                                                                                                                               |
| (c) Lysine biosynthesis                         | KO1929(murF)                                                                                                                                                                                                                                                                               |
| <b>Metabolism of other amino acids</b>          |                                                                                                                                                                                                                                                                                            |
| Taurine and Hypotaurine metabolism              | KO0925(ackA), KO0625 (eutD)                                                                                                                                                                                                                                                                |
| (b) D-glutamate and D-glutamine metabolism      | KO1925(Mur D)                                                                                                                                                                                                                                                                              |
| (c) D-Alanine metabolism                        | KO1921(ddl)                                                                                                                                                                                                                                                                                |
| <b>Glycan biosynthesis &amp; metabolism</b>     |                                                                                                                                                                                                                                                                                            |
| Peptidoglycan Biosynthesis                      | KO1924(murC), KO1925(murD), KO6153(uppP), KO0790(murA), KO1921(ddl), KO1929(murF)                                                                                                                                                                                                          |
| <b>Metabolism of Terpenoids and Polyketides</b> |                                                                                                                                                                                                                                                                                            |
| (a) Tetracycline biosynthesis                   | KO1962(aceA)                                                                                                                                                                                                                                                                               |
| <b>Membrane transport</b>                       |                                                                                                                                                                                                                                                                                            |
| (a) Phosphotransferase system                   | KO8483(PTS I), KO2768(fruA), KO2769(fruA), KO2770(fruA), KO2763(ptsG), KO2764(ptsG), KO2765(ptsG), KO2798(mtIA), KO2793, KO2794, KO2795                                                                                                                                                    |
| (b) Bacterial secretion system                  | KO3070(secA), KO3076 (secY), KO3070(azi, dix)                                                                                                                                                                                                                                              |
| (c) ABC transporters                            | KO2073                                                                                                                                                                                                                                                                                     |
|                                                 | KO3070(secA), KO3076(secY)                                                                                                                                                                                                                                                                 |
| <b>Protein export</b>                           |                                                                                                                                                                                                                                                                                            |
| <b>Genetic information processing</b>           |                                                                                                                                                                                                                                                                                            |
| (a) Ribosome                                    | KO2911(rpmF), KO2864(rplJ) KO2909(rpmE2), KO2939(rplI), KO2916(rpmI), KO2990(rpsF), KO2946(rpsJ,nusE), KO2892(rplW) KO2965(rpsS), KO2982(rpsC), KO2904(rpmC), KO2961(rpsQ), KO2994(rpsH), KO2933(rplF), KO2881(rplR), KO2907(rpmD), KO2876(rplO), KO2919(rpmJ), KO2968(rpsT), KO2970(rpsU) |
| (b) Nucleotide excision repair                  | KO3703(UvrC)                                                                                                                                                                                                                                                                               |
| (c) DNA replication                             | KO2337( dnaE),<br>KO2314(dnaC),KO2316(dnaG)                                                                                                                                                                                                                                                |
| (d) Homologous recombination                    | KO2337(dnaE), KO3626(recF)                                                                                                                                                                                                                                                                 |
| (e) Mismatch repair                             | KO2337(dnaE)                                                                                                                                                                                                                                                                               |
| (f) RNA degradation                             | KO3628(Rho)                                                                                                                                                                                                                                                                                |
| (g) RNA polymerase                              | KO3040(rpoA)                                                                                                                                                                                                                                                                               |

(h)Cell-cycle Caulobacter KO3590(ftsA), KO3531(ftsZ), KO2314(dnaC), KO2313(dnaA)  
**Epithelial cell signaling in Helicobacter pylori infection** KO1428(ureC)

**Table 2:** List of Essential non-human homolog membrane proteins in *S. aureus* N315 strain identified by PSORTb and Protein Families Of Membrane-bound Hypothetical Proteins identified by SVM-PROT

| SN.        | Accession No.       | Name of Protein                                                      |
|------------|---------------------|----------------------------------------------------------------------|
| 1.         | GI:15926360         | UDP pyrophosphate phosphatase                                        |
| 2.         | GI: 15926377        | Fructose specific permease                                           |
| 3.         | GI:15927459         | Two-component sensor histidine kinase                                |
| 4.         | GI:15927681         | F0F1 ATP synthase subunit B                                          |
| 5.         | GI:15927652         | potassium-transporting ATPase subunit A                              |
| 6.         | GI:15928117         | PTS system, glucose-specific IIABC component                         |
| 7.         | GI:15927975         | Respiratory nitrate reductase alpha chain                            |
| 8.         | GI:15927810         | Preprotein translocase subunit SecY                                  |
| <b>SN.</b> | <b>Accession No</b> | <b>Protein family of Hypothetical proteins generated by svm-prot</b> |
| 9.         | GI:15926499         | Lipid-binding Protein                                                |
| 10.        | GI:15926454         | Transmembrane, Electrochemical potential-driven transporter          |
| 11.        | GI:15926933         | Transmembrane, Manganese-binding Protein                             |
| 12.        | GI:15928227         | Transmembrane, Transferase                                           |
| 13.        | GI:15927946         | Electrochemical potential driven transporter                         |
| 14.        | GI:15927800         | Transmembrane, Zinc-binding protein                                  |
| 15.        | GI:15926141         | Lipid Binding Protein                                                |
